# Supplementary material for: Ordered mesoporous CoFe2O4 nanoparticles: molten-salt-assisted rapid nanocasting synthesis and the effects of calcining heating rate
Source: Royal Society of Chemistry journal article supplement (doi:10.1039/c4nj00235k), 2014-01-01
Supplement: c4nj00235k1.pdf [file c4nj00235k1.pdf]

*Electronic supplementary information for*

***New Journal of Chemistry***

**Ordered Mesoporous CoFe<sub>2</sub>O<sub>4</sub> Nanoparticles: Molten-Salt-Assisted  
Rapid Nanocasting Synthesis and the Effects of Calcining Heating  
Rate**

Qi Cao<sup>1</sup>, Zhengwang Liu<sup>1</sup> and Renchao Che<sup>1\*</sup>

<sup>1</sup> *Department of Materials Science, Laboratory of Advanced Materials, Fudan University,  
Shanghai 200438, People's Republic of China*

\* Corresponding author: [rcche2008@gmail.com](mailto:rcche2008@gmail.com)

This file contains:

Supporting figure S1.

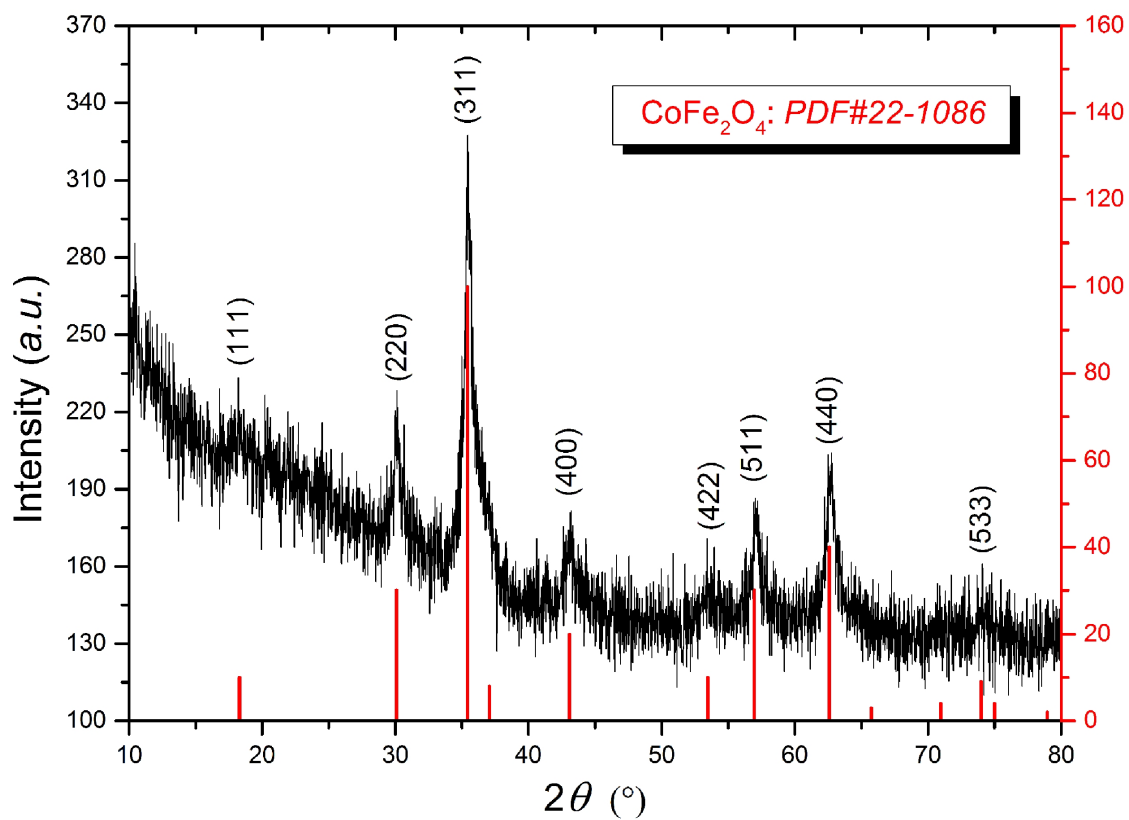

**Fig. S1.** Representative XRD pattern of the nanoparticle sample obtained by calcining at 400°C for 5 h with the *CHR* of 7°C/min.
